# Supplementary material
Source: Copernicus journal article supplement (doi:10.5194/acp-26-9017-2026)
Supplement: Supplementary file 1 [file acp-26-9017-2026-supplement.pdf]

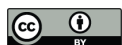

*Supplement of*

## **Anthropogenic modulation of dust-dominated ice nucleation in an urban dryland city of China during winter and spring**

**Chengqing Chen et al.**

*Correspondence to:* Yang Wang ([wang\\_yang@lzu.edu.cn](mailto:wang_yang@lzu.edu.cn))

The copyright of individual parts of the supplement might differ from the article licence.

## 1 Contents

|    |                                                                                                            |
|----|------------------------------------------------------------------------------------------------------------|
| 2  | S1. Definition and Calculation Methods of Normalized Ice Nucleation Parameters                             |
| 3  | S2. Definition and modification of the sensitivity metric $A^{-1}$                                         |
| 4  | S3. Empirical parameterization schemes for INPs                                                            |
| 5  | S4. Calculation Equation for ice nucleation activity evaluation index                                      |
| 6  | Fig. S1. Geographical location of Lanzhou City within China.                                               |
| 7  | Fig. S2. Aerosol Size Distribution Characteristics                                                         |
| 8  | Fig. S3. Aerosol type classification based on $PM_{10}$ and $PM_{2.5}$ concentrations                      |
| 9  | Fig. S4. Aerosol ice nucleation activity tests performed at different temperatures under identical         |
| 10 | supersaturation conditions                                                                                 |
| 11 | Fig. S5. Ice nucleation activity test of aerosol particles under different supersaturation conditions at a |
| 12 | constant temperature                                                                                       |
| 13 | Fig. S6. Source regions and land-cover characteristics of backward trajectories arriving in Lanzhou        |
| 14 | Fig. S7. Monthly variations and Seasonal differences in aerosol size distribution, PM mass concentrations, |
| 15 | and water-soluble ion components                                                                           |
| 16 | Fig. S8. Time series of INPs and aerosol characteristics                                                   |
| 17 | Fig. S9. Time series of key meteorological variables at the Yuzhong meteorological station                 |
| 18 | Fig. S10. Time series of INP concentrations at different temperature layers                                |
| 19 | Fig. S11. 72-hour backward trajectory distribution of different aerosol event types                        |
| 20 | Fig. S12. Relationships between INPs and aerosol number concentrations                                     |
| 21 | Fig. S13. Relationships between FMD and aerosol number concentrations                                      |
| 22 | Fig. S14. Relationships between INP concentration and aerosol number concentrations                        |
| 23 | Fig. S15. Pearson correlations between INP concentrations and aerosol particle number concentrations       |
| 24 | across different event types                                                                               |
| 25 | Table S1. Monthly and seasonal (winter and spring) median concentrations and interquartile ranges          |
| 26 | (25th–75th percentiles) of crustal trace metals (Ca, Al, Si, Fe, and Ti)                                   |
| 27 | Table S2. Fitting results of single-parameter INP models under different pollution event types             |
| 28 | Table S3. Fitting results of two-parameter models for INPs concentration prediction in Lanzhou             |

## 29 S1. Definition and Calculation Methods of Normalized Ice Nucleation Parameters

30 In this study, to systematically evaluate the ice-nucleating ability of different aerosol components, we  
31 employed multiple normalization methods to characterize ice nucleation activity (Moore et al., 2025).  
32 The activation fractions  $N_{D>0.5}$  and  $N_{D>1.0}$  represent the observed INPs concentration normalized to the  
33 number concentration of aerosol particles with diameters greater than 0.5  $\mu\text{m}$  ( $n_{0.5}$ ) and 1  $\mu\text{m}$  ( $n_{1.0}$ ), both  
34 constrained to particles smaller than 2.5  $\mu\text{m}$ , respectively. Their corresponding equations are provided as  
35 Eq.(S1) and Eq.(S2). In addition, a normalization parameter based on the total aerosol surface area  
36 ( $SA_{\text{tot}}$ ), denoted as  $N_s$ , was used. Its calculation method is shown in Eq. (S3). This indicator reflects the  
37 nucleation potential per unit surface area.

$$N_{D>0.5}(T) = \frac{N_{\text{INP}}(T)}{n_{0.5}} \quad (\text{S1})$$

$$N_{D>1.0}(T) = \frac{N_{\text{INP}}(T)}{n_{1.0}} \quad (\text{S2})$$

$$N_s(T) = \frac{N_{\text{INP}}(T)}{SA_{\text{tot}}} \quad (\text{S3})$$

## 38 S2. Definition and modification of the sensitivity metric $A^{-1}$

39 A sensitivity metric  $A_{\text{dust,lab}}$  to quantify the relative importance of temperature and dust abundance for  
40 immersion freezing (Villanueva et al., 2025). Based on laboratory constraints, INP concentrations were  
41 expressed as a function of the logarithm of dust aerosol optical depth (LD) and temperature (T):

$$\text{INP}_{\text{dust}}(T, \text{LD}) = C_1 \cdot \text{LD} \cdot \exp(-A_{\text{dust,lab}} T) \quad (\text{S4})$$

42 where  $A_{\text{dust,lab}}$  ( $\text{K}^{-1}$ ) is the slope parameter governing temperature sensitivity. By definition, as shown in  
43 Eq.(S5).

$$A_{\text{dust,lab}} = \frac{\left(\frac{\partial \text{INP}}{\partial T}\right)}{\left(\frac{\partial \text{INP}}{\partial \text{LD}}\right)} \quad (\text{S5})$$

44 In our observational framework, we adapt this metric to surface measurements by replacing dust aerosol  
45 optical depth (DAOD) with Fine mineral dust (FMD) mass concentration as a robust proxy for mineral  
46 dust. In addition, secondary inorganic aerosol (SNA) is included as a marker of secondary aerosols,  
47 allowing us to assess how pollution modulates the dust-temperature sensitivity balance. Specifically, we

48 employ the following log-linear regression model:

$$\ln(\text{INP}) = b_0 + b_1 \ln(\text{FMD}) + b_2 (-T) + b_3 \ln(\text{SNA}) + b_4 [\ln(\text{FMD}) \ln(\text{SNA})] + \varepsilon \quad (\text{S6})$$

49 where  $b_1$  represents the main effect of FMD,  $b_2$  the temperature sensitivity,  $b_3$  the main effect of SNA,  
50 and  $b_4$  the FMD–SNA interaction term. The term  $\varepsilon$  denotes the residual error.

51 From this regression model, the dust sensitivity conditional on SNA is given by:

$$\frac{\partial \ln(\text{INP})}{\partial \ln(\text{FMD})} = b_1 + b_4 z, \quad z = \ln(\text{SNA}) \quad (\text{S7})$$

52 while the temperature sensitivity is:

$$\frac{\partial \ln(\text{INP})}{\partial (-T)} = b_2 \quad (\text{S8})$$

53 Accordingly, we define the observational  $A$  and  $A^{-1}$  as:

$$A(z) = \frac{b_2}{b_1 + b_4 z} \quad \text{and} \quad A^{-1}(z) = \frac{b_1 + b_4 z}{b_2} \quad (\text{S9})$$

54 where  $A$  ( $\text{K}^{-1}$ ) denotes the number of “e-fold dust increases” equivalent to 1 K cooling, and  $A^{-1}$  ( $\text{K}^{-1}$ )  
55 denotes the effective cooling equivalent to one e-fold (i.e., based on the natural exponential e) dust  
56 increase.

### 57 **S3. Empirical parameterization schemes for INPs**

58 To quantitatively describe the relationship between INP concentrations, temperature, and aerosol  
59 properties, we constructed two empirical parameterization models.

60 Following the exponential form of Meyers et al. (1992), a single-parameter model was established with  
61 air temperature ( $T$ , in K) as the sole predictor (Eq.(S10)):

$$N_{\text{IN},T_k} = \exp[a_1 + b_1 (273.15 - T_k)] \quad (\text{S10})$$

62 where  $a_1$  and  $b_1$  are regression coefficients fitted to the observed dataset. The second scheme adopts the  
63 framework of DeMott et al. (2010), which originally incorporated  $n_{0.5}$  together with temperature. In this  
64 study, we modified the predictor to  $n_{1.0}$ , in order to better represent coarse-mode aerosols observed in  
65 Lanzhou, and re-fitted all coefficients using the measurement dataset (Eq.(S11)):

$$n_{\text{IN},T_k} = a_2 (273.16 - T_k)^{b_2} (n_{1.0}) (c_2 (273.16 - T_k) + d_2) \quad (\text{S11})$$

66 where  $a_2, b_2, c_2, d_2$  are empirical fitting parameters.

#### 67 **S4. Calculation Equation for ice nucleation activity evaluation index**

68 To evaluate the fitting accuracy of INP parameterization, this study used three statistical metrics:  
69 coefficient of determination ( $R^2$ ), root-mean-square error (RMSE), and fraction of predictions within a  
70 factor of 5 (FAC<sub>5</sub>). The formulas are provided in Eq.(S12–14). All metrics are computed in the natural  
71 log space (ln) to mitigate the influence of data with different orders of magnitude on the statistical results.

$$R^2 = 1 - \frac{\sum_{i=1}^n [\ln(N_{\text{obs},i}) - \ln(N_{\text{fit},i})]^2}{\sum_{i=1}^n [\ln(N_{\text{obs},i}) - \overline{\ln(N_{\text{obs}})}]^2} \quad (\text{S12})$$

$$\text{RMSE} = \sqrt{\frac{1}{n} \sum_{i=1}^n [\ln(N_{\text{obs},i}) - \ln(N_{\text{fit},i})]^2} \quad (\text{S13})$$

$$\text{FAC}_5 = \frac{1}{n} \sum_{i=1}^n [|\ln(N_{\text{fit},i}) - \ln(N_{\text{obs},i})| \leq \ln(5)] \times 100\% \quad (\text{S14})$$

72 Here,  $N_{\text{obs},i}$  and  $N_{\text{fit},i}$  represent the observed and predicted INP concentrations, respectively. The variable  
73  $n$  is the sample size.

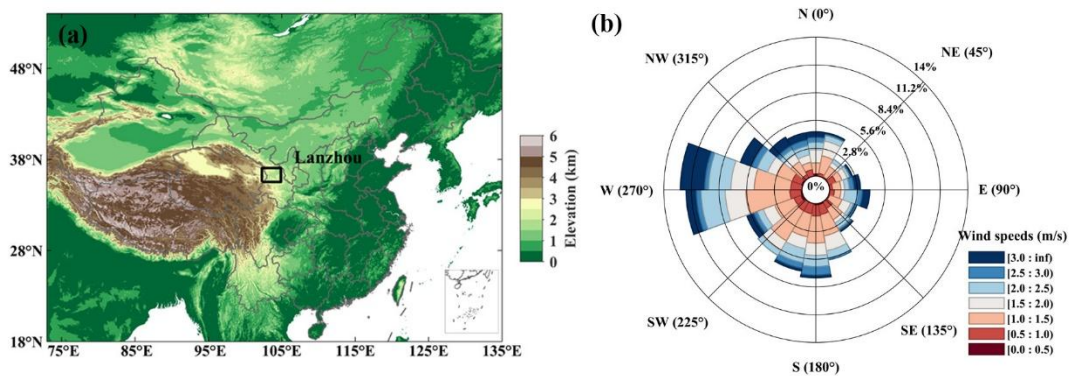

74

75 Fig. S1. Geographical location of Lanzhou City and wind characteristics during the observation period. (a)

76 Geographical location and topography of Lanzhou City in northwestern China. The black rectangle indicates the

77 study region. (b) Wind rose showing the distribution of wind direction and wind speed.

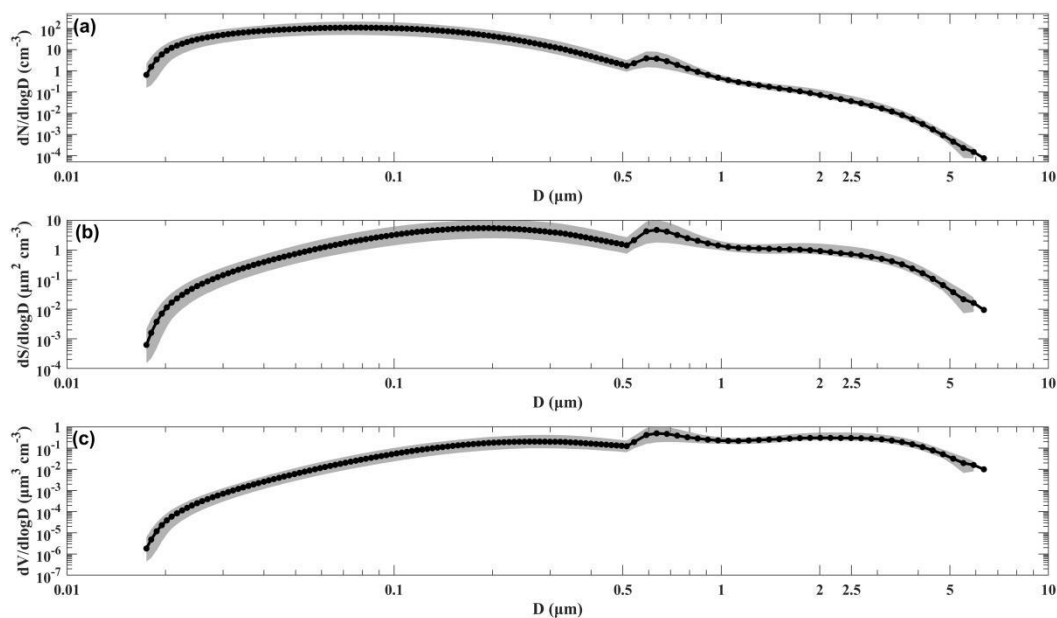

78

79 Fig. S2. Aerosol Size Distribution Characteristics. (a) Particle Number Density Distribution. (b) Surface Area

80 Density Distribution. (c) Volume Density Distribution. The black solid circles represent the median for all time

81 periods in each particle size range, and the grey shading denotes the range between the 25th and 75th percentiles.

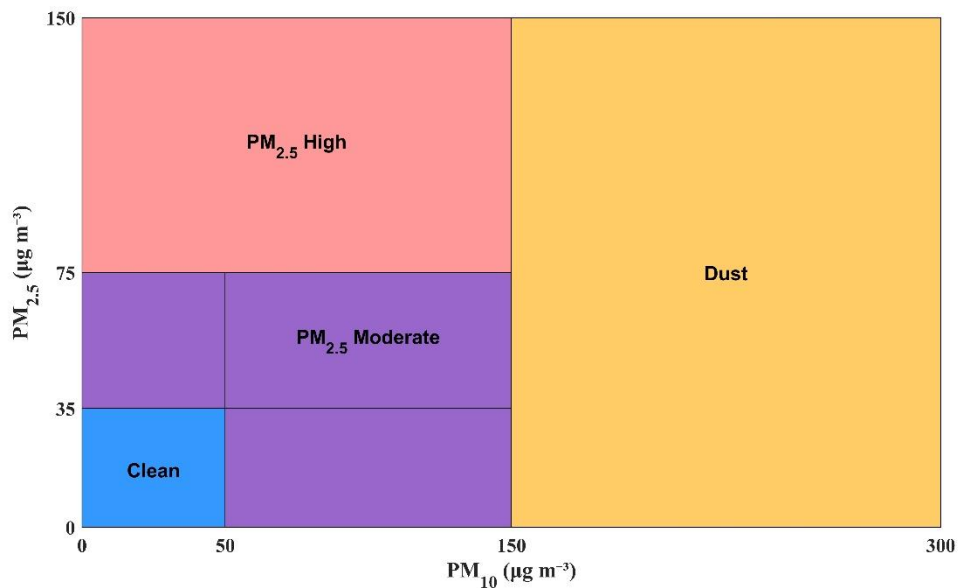

82

83 Fig. S3. Aerosol type classification based on  $PM_{10}$  and  $PM_{2.5}$  concentrations. Four categories are defined using  
 84 threshold values of  $PM_{2.5}$  (35, 75  $\mu\text{g m}^{-3}$ ) and  $PM_{10}$  (50, 150  $\mu\text{g m}^{-3}$ ), following the Chinese National Ambient Air  
 85 Quality Standards (GB3095-2012).

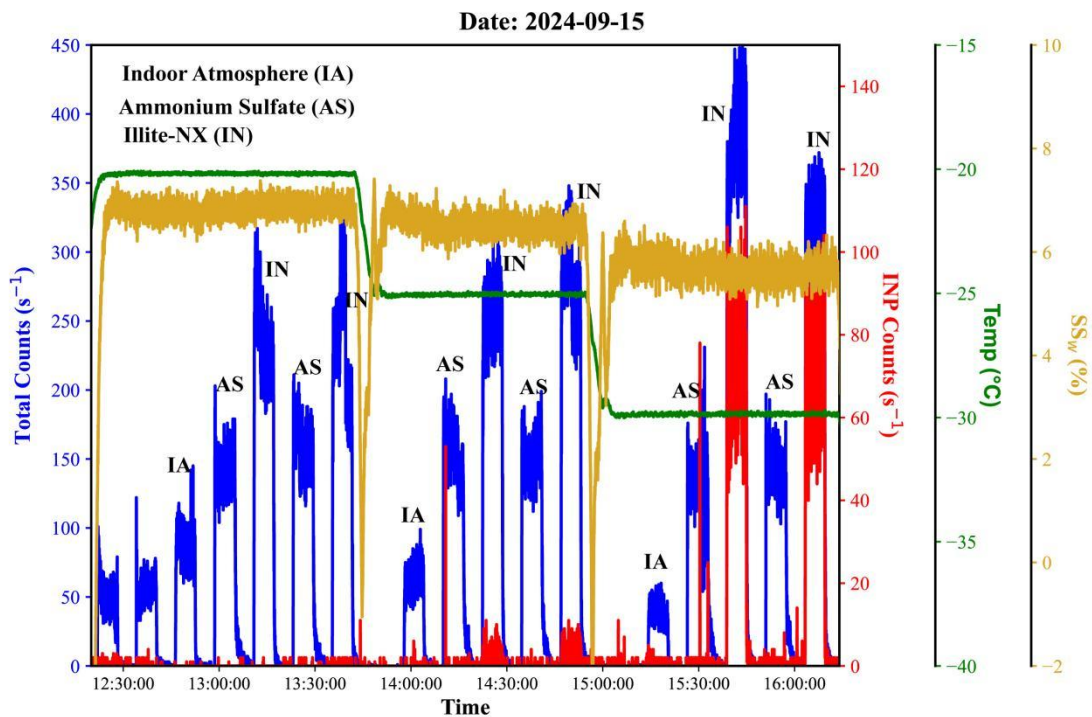

86

87 Fig. S4. Aerosol ice nucleation activity tests performed at different temperatures under identical supersaturation  
 88 conditions. Indoor atmospheric samples, ammonium sulfate, and illite-NX were tested separately for their ice  
 89 nucleation activity. The figure presents time series at one-second resolution for total particle count, INPs count,  
 90 temperature, and supersaturation relative to water ( $SS_w$ ).

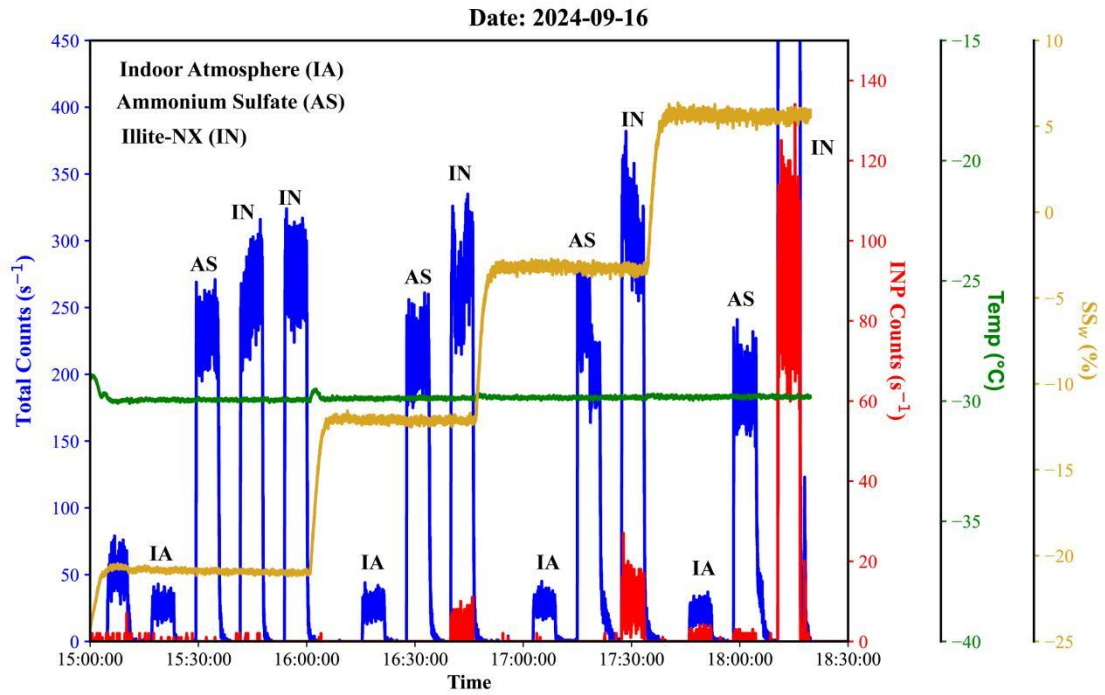

91

92 Fig. S5. Ice nucleation activity test of aerosol particles under different supersaturation conditions at a constant  
 93 temperature. Indoor atmospheric samples, ammonium sulfate, and illite-NX were tested separately for their ice  
 94 nucleation activity. The figure presents time series at one-second resolution for total particle count, INPs count,  
 95 temperature, and supersaturation relative to water ( $SS_w$ ).

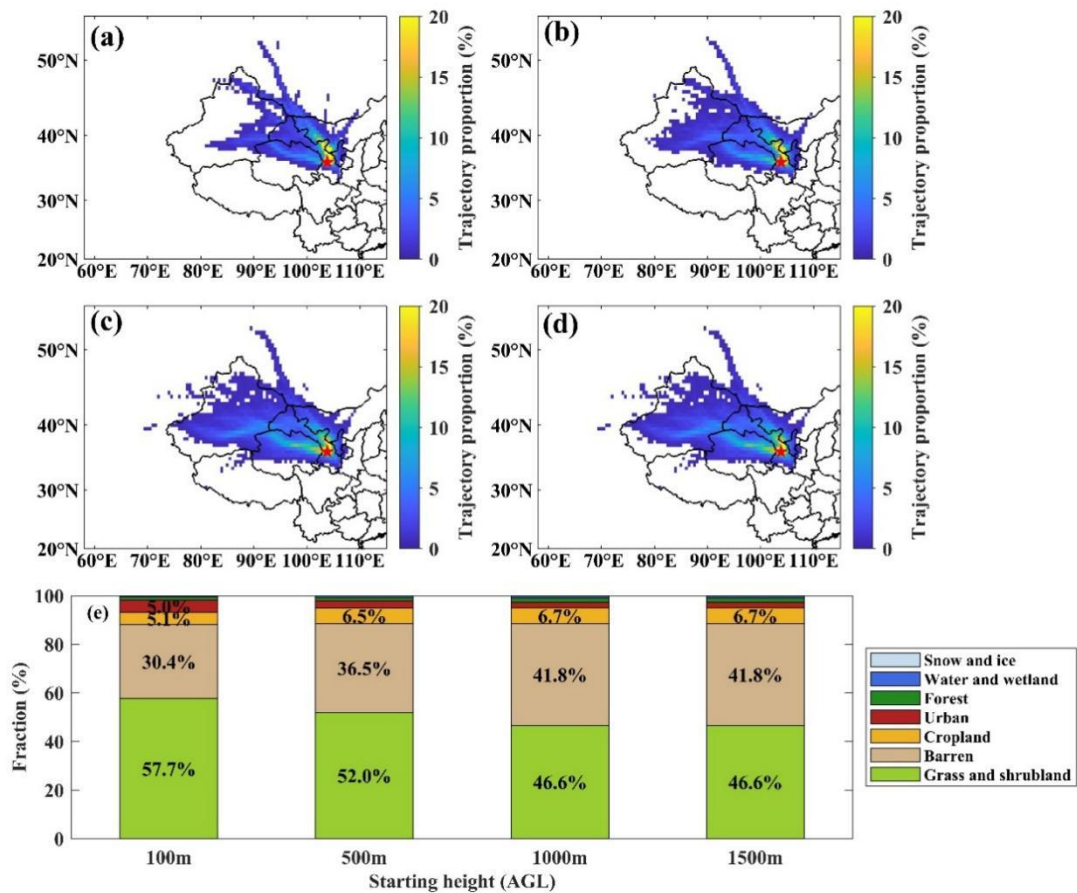

96

97 Fig. S6. Source regions and land-cover characteristics of backward trajectories arriving in Lanzhou. Spatial  
 98 distributions of 72-h backward trajectory frequencies (trajectory proportion, %) for air masses arriving at Lanzhou  
 99 at four starting heights above ground level (AGL): (a) 100 m, (b) 500 m, (c) 1000 m, and (d) 1500 m. The red star  
 100 indicates the sampling site. Panel (e) shows the fractional contributions of major land-cover types sampled by the  
 101 trajectories at the corresponding starting heights, including snow and ice, water and wetland, forest, urban, cropland,  
 102 barren, and grass and shrubland.

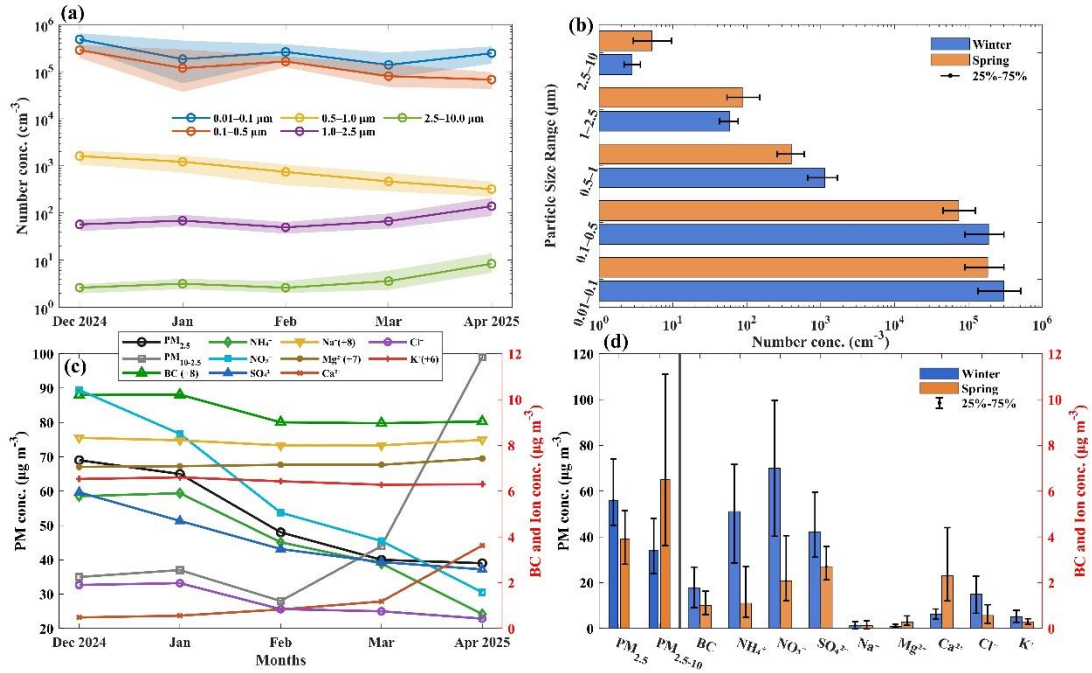

103

104

Fig. S7. Monthly variations and Seasonal differences in aerosol size distribution, PM mass concentrations, and water-soluble ion components. (a) Monthly median aerosol number concentrations in five size bins. (b) Seasonal median aerosol number size distributions. (c) Monthly median mass concentrations. Values in parentheses denote the offsets applied for graphical clarity and actual concentrations should be obtained by subtracting the offset values. (d) Seasonal mass concentrations of the same species as in (c). Unless otherwise noted, error bars and shaded areas represent the 25th–75th percentile ranges.

106

107

108

109

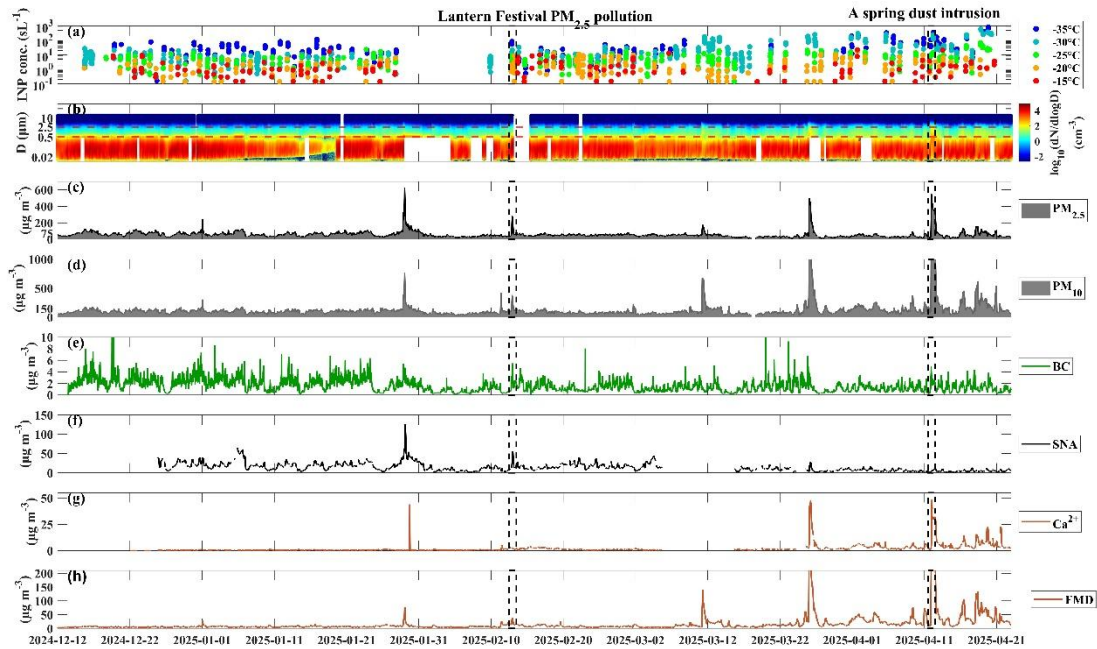

110

111

Fig. S8. Time series of INPs and aerosol characteristics. (a) INP concentrations at five activation temperatures. (b) Aerosol particle size distribution. The red dashed lines indicate particle sizes of 0.5 μm and 2.5 μm. Data gaps are shown as blank areas. (c)–(h) Time series of PM<sub>2.5</sub>, PM<sub>10</sub>, BC, SNA, water-soluble Ca<sup>2+</sup>, and FMD, respectively. Vertical dashed lines denote representative aerosol events analyzed in Sect. 3.1.

112

113

114

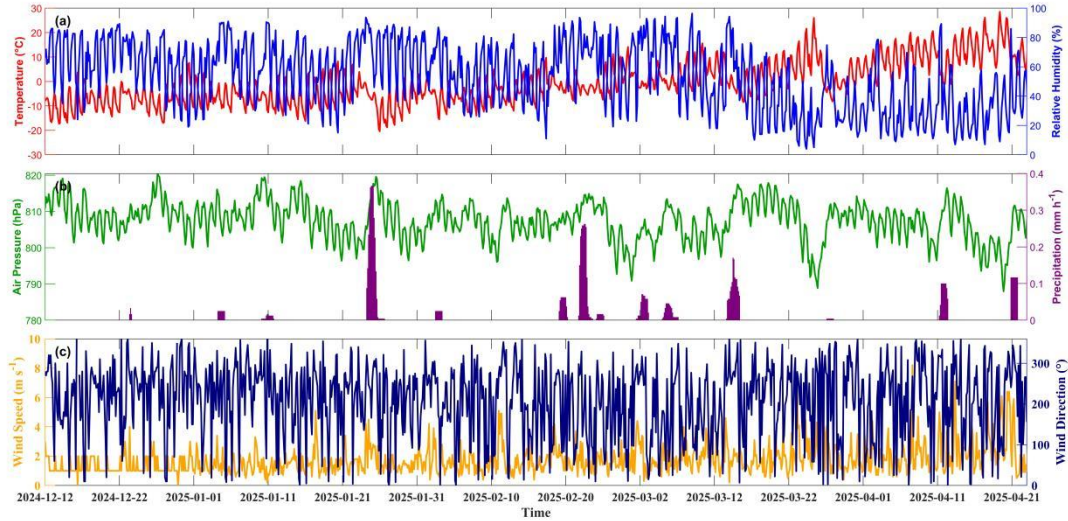

115

116 Fig. S9. Time series of key meteorological variables at the Yuzhong meteorological station. (a) Temperature and  
 117 relative humidity. (b) Air pressure and precipitation. (c) Wind speed and direction. The station is located  
 118 approximately 30 km from the sampling site. Data source: NOAA National Centers for Environmental Information,  
 119 Global Surface Hourly Data for Station 529830-99999 (Yuzhong), China, 2010–2020; accessed June 1, 2025.

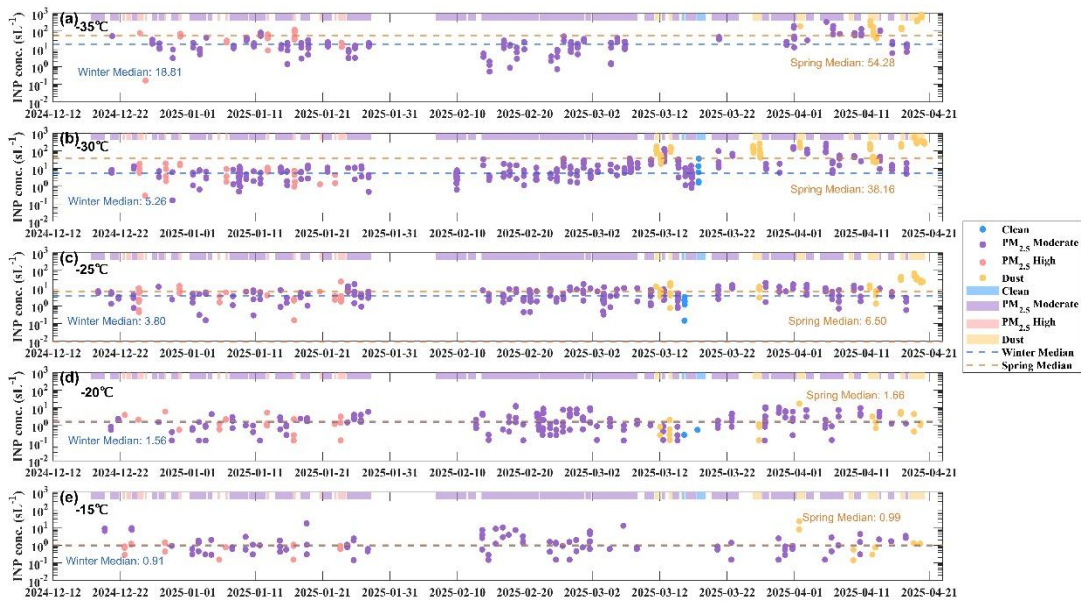

120

121 Fig. S10. Time series of INP concentrations at different temperature layers. The shaded areas in distinct colors  
 122 represent the temporal distribution of different aerosol types, with the INP concentration for each aerosol type  
 123 indicated by scattered points of corresponding colors. The dotted line indicates the median INP concentration for all  
 124 aerosol types in winter and spring, with the values shown in the corresponding colors.

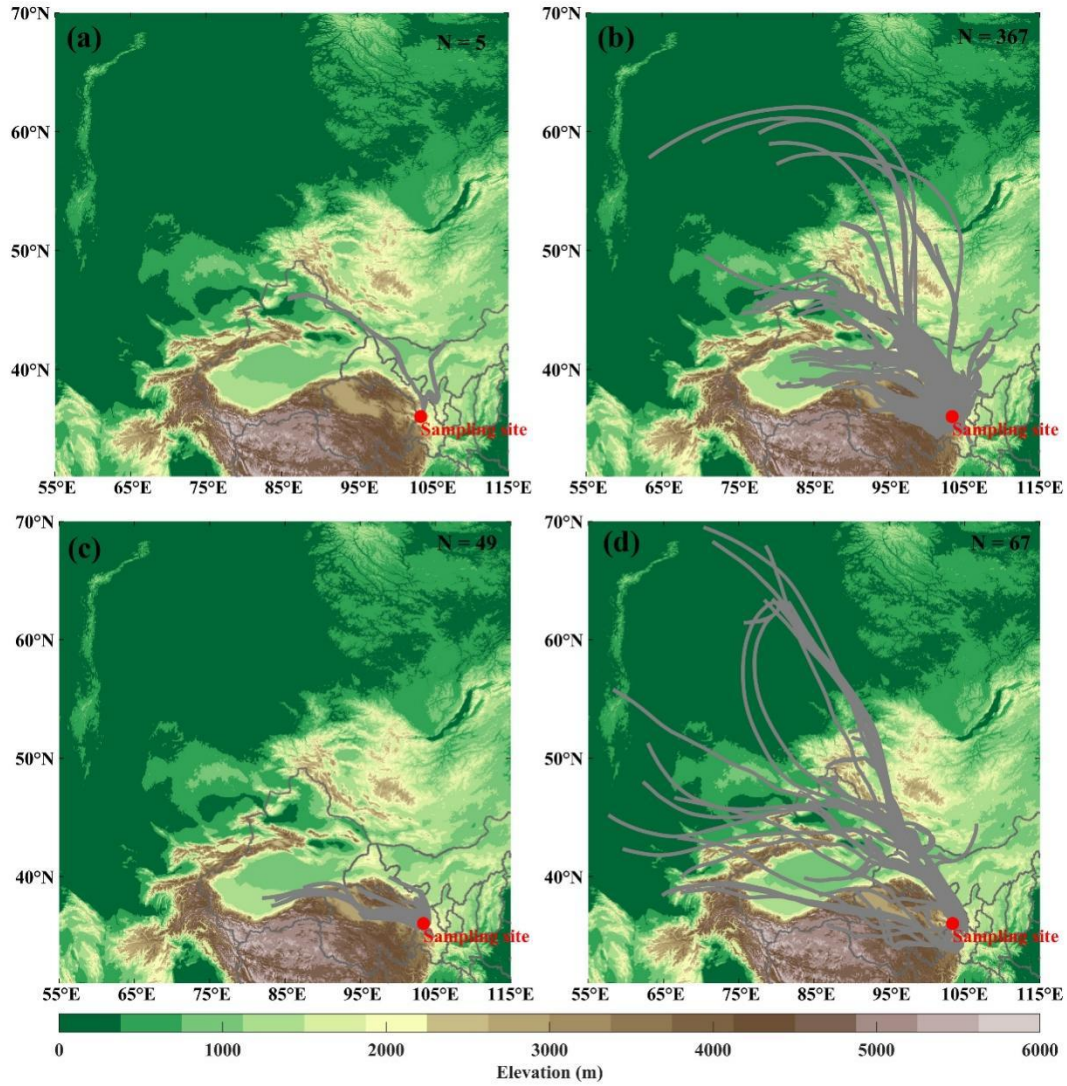

125

126 Fig. S11. 72-hour backward trajectory distribution of different aerosol event types. (a) Clean events. (b) PM<sub>2.5</sub>  
 127 Moderate events. (c) PM<sub>2.5</sub> High events. (d) Dust events. The gray curve shows a single backward trajectory for the  
 128 event type, with the starting point located at an altitude of 100 m at the sampling site. The number of trajectories (N)  
 129 for the event type is shown in the upper right corner.

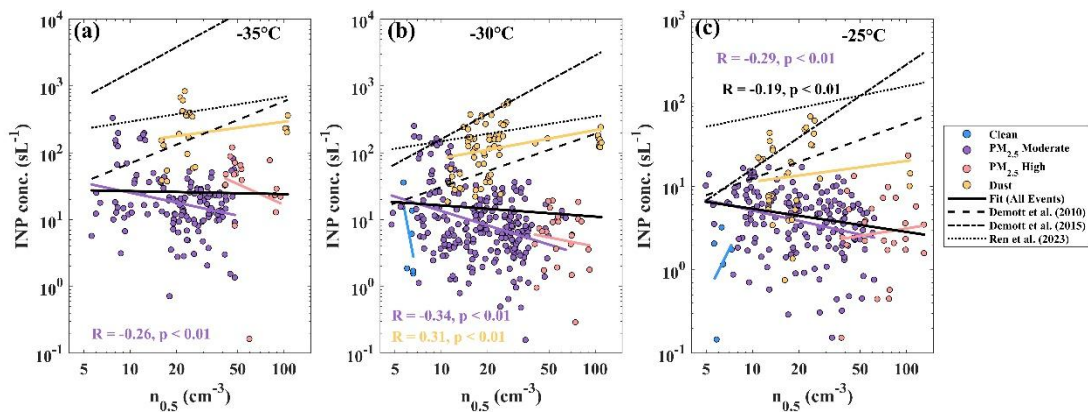

130

131 Fig. S12. Relationships between INPs and aerosol number concentrations. (a–c) show the relationships between INP

132 concentrations and  $n_{0.5}$ . The black dashed line indicates the prediction from existing parameterization schemes. The  
 133  $R$  and  $p$  values represent the Pearson correlation coefficient and its significance, and only results with  $p < 0.01$  are  
 134 shown.

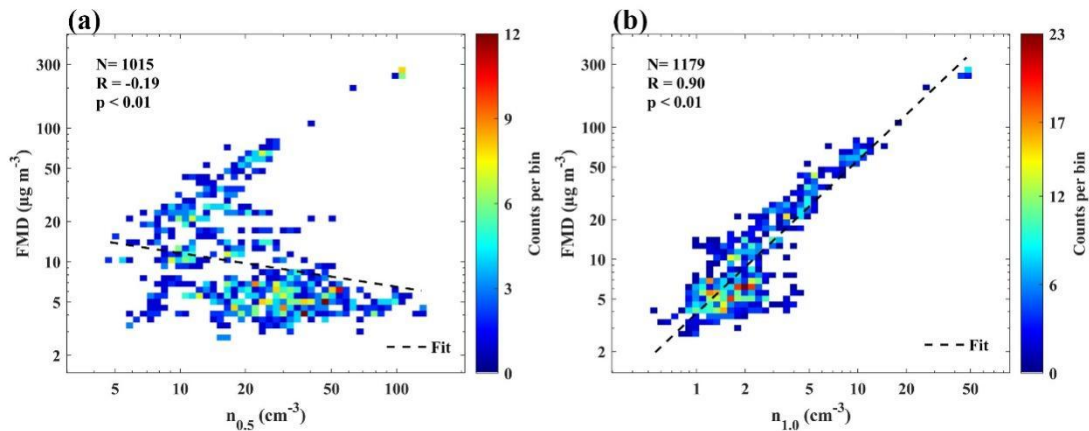

135  
 136 Fig. S13. Relationships between FMD and aerosol number concentrations. Two-dimensional histograms of  $n_{0.5}$  and  
 137  $n_{1.0}$  versus PMD, respectively. Data from five temperatures and four aerosol event types are combined. The X and Y  
 138 axes are binned into 50 intervals in the natural log space, and the color shading indicates the number of samples in  
 139 each bin.  $N$  denotes the total number of data points.  $R$  and  $p$  are the Pearson correlation coefficient and the  
 140 corresponding significance level.

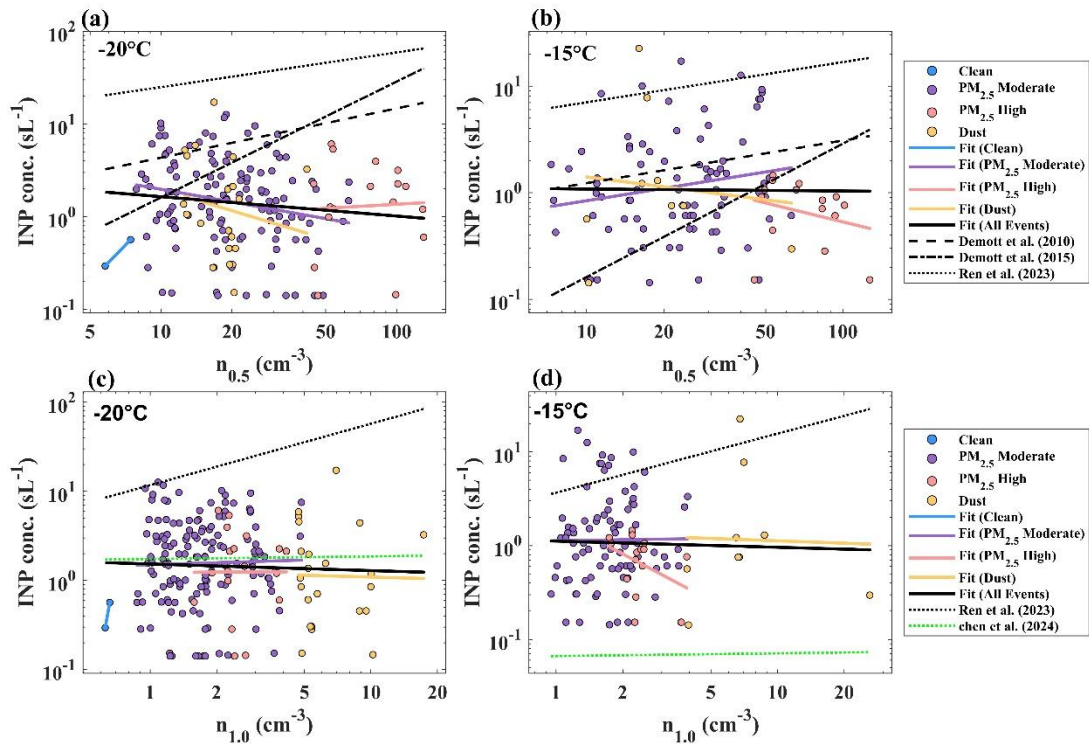

141  
 142 Fig. S14. Relationships between INP concentration and aerosol number concentrations. (a–b) show the relationships  
 143 between INP concentration and  $n_{0.5}$ , while (c–d) depict the relationships with  $n_{1.0}$ . The  $R$  and  $p$  values represent the  
 144 Pearson correlation coefficient and its significance, and only results with  $p < 0.01$  are shown. The black solid line  
 145 shows the fit for all samples, and the black dashed line indicates the prediction from existing parameterization  
 146 schemes.

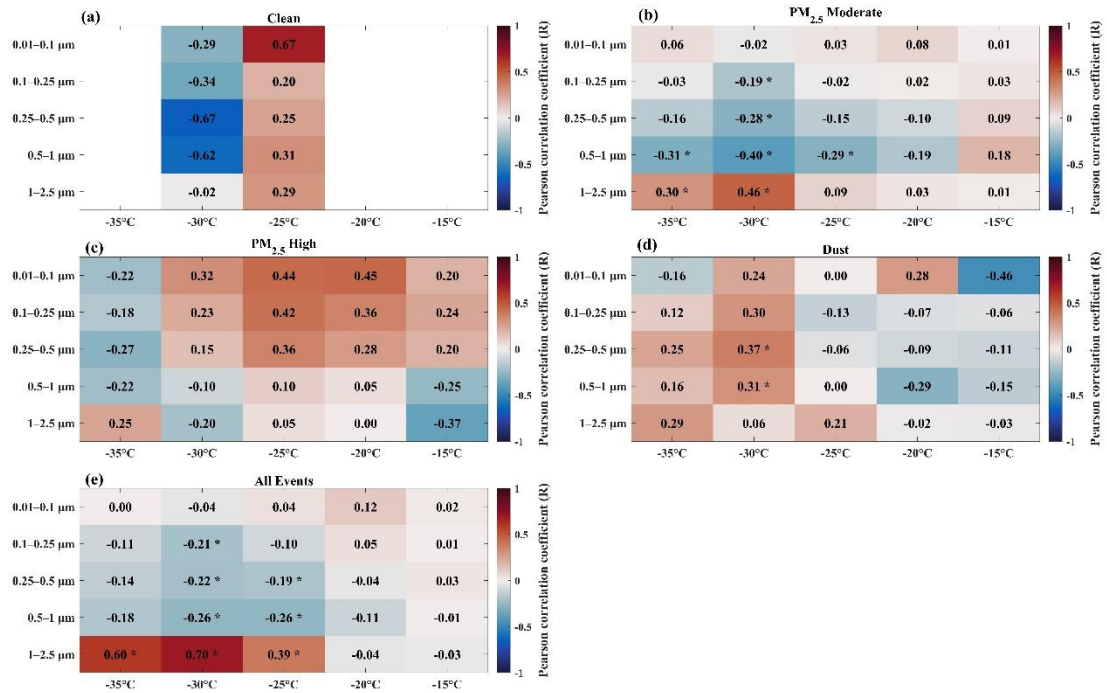

147

148 Fig. S15. Pearson correlations between INP concentrations and aerosol particle number concentrations across  
 149 different event types. The  $R$  represent the Pearson correlation coefficient, calculated in the natural log space.

150 Statistically significant correlations ( $p < 0.01$ ) are marked with asterisks.

151  
152

**Table S1. Monthly and seasonal (winter and spring) median concentrations and interquartile ranges (25th–75th percentiles) of crustal trace metals (Ca, Al, Si, Fe, and Ti)**

| Time period | Ca                               | Al                               | Si                               | Fe                              | Ti                           |
|-------------|----------------------------------|----------------------------------|----------------------------------|---------------------------------|------------------------------|
| 2024-12     | 322.65<br>(249.84–<br>405.14)    | 804.00<br>(736.00–<br>900.00)    | 493.37<br>(415.97–<br>569.82)    | 475.54<br>(261.04–<br>820.95)   | 14.20<br>(11.60–<br>17.13)   |
| 2025-01     | 444.36<br>(321.61–<br>574.20)    | 852.00<br>(759.00–<br>984.00)    | 701.63<br>(576.73–<br>910.34)    | 640.27<br>(418.96–<br>1029.76)  | 22.32<br>(17.48–<br>32.70)   |
| 2025-02     | 541.77<br>(355.66–<br>842.28)    | 852.00<br>(748.00–<br>1000.00)   | 927.83<br>(630.40–<br>1531.80)   | 448.66<br>(302.50–<br>700.91)   | 25.54<br>(18.70–<br>37.85)   |
| 2025-03     | 1069.35<br>(500.68–<br>1585.91)  | 1048.00<br>(820.00–<br>1354.00)  | 1976.93<br>(897.48–<br>3044.36)  | 681.28<br>(352.56–<br>1158.29)  | 46.50<br>(23.32–<br>69.65)   |
| 2025-04     | 2644.23<br>(1544.39–<br>4610.21) | 1824.50<br>(1284.00–<br>2593.00) | 5195.02<br>(2780.97–<br>8903.08) | 1538.75<br>(899.98–<br>2450.60) | 111.91<br>(63.53–<br>185.18) |
| Winter      | 421.98<br>(297.78–<br>580.78)    | 836.00<br>(748.00–<br>956.00)    | 667.39<br>(491.08–<br>957.53)    | 529.55<br>(327.93–<br>838.15)   | 20.24<br>(14.61–<br>28.98)   |
| Spring      | 1507.89<br>(895.95–<br>2870.87)  | 1280.00<br>(972.00–<br>1946.00)  | 2746.33<br>(1713.39–<br>5838.72) | 964.06<br>(571.82–<br>1781.12)  | 62.10<br>(40.41–<br>123.53)  |

153

**Note: Concentrations are in ng m<sup>-3</sup>. Data span from 12 December 2024 to 20 April 2025.**

154

**Table S2. Fitting results of single-parameter INPs models under different pollution event types**

| Event                      | $a_1$   | $b_1$  | $R^2$ | RMSE | FAC <sub>5</sub> |
|----------------------------|---------|--------|-------|------|------------------|
| All Event                  | -3.0599 | 0.1875 | 0.39  | 1.40 | 76.33%           |
| Clean                      | -6.2371 | 0.2597 | 0.44  | 1.06 | 84.62%           |
| PM <sub>2.5</sub> Moderate | -2.3477 | 0.1492 | 0.41  | 1.11 | 84.98%           |
| PM <sub>2.5</sub> High     | -3.2722 | 0.1746 | 0.49  | 1.15 | 86.54%           |
| Dust                       | -6.0673 | 0.3531 | 0.70  | 1.11 | 89.20%           |

155

156

**Table S3. Fitting results of two-parameter models for INPs concentration prediction in Lanzhou**

---

| $a_2$  | $b_2$  | $c_2$  | $d_2$   | $R^2$ | RMSE | FAC <sub>5</sub> |
|--------|--------|--------|---------|-------|------|------------------|
| 0.0007 | 2.6168 | 0.0934 | -1.6206 | 0.59  | 1.15 | 82.78%           |

---

157

158 Chen, J., Wu, Z., Gong, X., Qiu, Y., Chen, S., Zeng, L., and Hu, M.: Anthropogenic dust as a significant  
159 source of ice-nucleating particles in the urban environment, *Earth's Future*, 12, e2023EF003738,  
160 doi:10.1029/2023EF003738, 2024.

161 DeMott, P. J., Prenni, A. J., Liu, X., Kreidenweis, S. M., Petters, M. D., Twohy, C. H., Richardson, M.  
162 S., Eidhammer, T., and Rogers, D. C.: Predicting global atmospheric ice nuclei distributions and their  
163 impacts on climate, *Proc. Natl. Acad. Sci. U.S.A.*, 107, 11217–11222, doi:10.1073/pnas.0910818107,  
164 2010.

165 DeMott, P. J., Prenni, A. J., McMeeking, G. R., Sullivan, R. C., Petters, M. D., Tobo, Y., Niemand, M.,  
166 Möhler, O., Snider, J. R., Wang, Z., and Kreidenweis, S. M.: Integrating laboratory and field data to  
167 quantify the immersion freezing ice nucleation activity of mineral dust particles, *Atmos. Chem. Phys.*,  
168 15, 393–409, doi:10.5194/acp-15-393-2015, 2015.

169 Meyers, M. P., DeMott, P. J., and Cotton, W. R.: New primary ice nucleation parameterizations in an  
170 explicit cloud model, *J. Appl. Meteorol.*, 31, 708–721, doi:10.1175/1520-  
171 0450(1992)031<0708:NPINPI>2.0.CO;2, 1992.

172 Moore, K. A., Hill, T. C. J., Madawala, C. K., Leibensperger III, R. J., Greeney, S., Cappa, C. D., Stokes,  
173 M. D., Deane, G. B., Lee, C., Tivanski, A. V., Prather, K. A., and DeMott, P. J.: Wind-driven emission  
174 of marine ice-nucleating particles in the Scripps Ocean-Atmosphere Research Simulator (SOARS),  
175 *Atmos. Chem. Phys.*, 25, 3131–3159, <https://doi.org/10.5194/acp-25-3131-2025>, 2025.

176 Ren, Y. Z., Bi, K., Fu, S. Z., Tian, P., Huang, M. Y., Zhu, R. H., and Xue, H. W.: The relationship of  
177 aerosol properties and ice-nucleating particle concentrations in Beijing, *J. Geophys. Res. Atmos.*, 128,  
178 e2022JD037383, doi:10.1029/2022JD037383, 2023.

179 Villanueva, D., Stengel, M., Hoose, C., Bruno, O., Jeggler, K., Ansmann, A., and Lohmann, U.: Dust-  
180 driven droplet freezing explains cloud-top phase in the Northern Extratropics, *Science*, 389, 521–525,  
181 doi:10.1126/science.adt5354, 2025.
